# Supplementary material for: The impact of lentiviral vector genome size and producer cell genomic to gag-pol mRNA ratios on packaging efficiency and titre
Source: PubMed Central journal article supplement — Mol Ther Methods Clin Dev. 2021 Apr 16;21:574–84. doi: 10.1016/j.omtm.2021.04.007 (PMC8141603; doi:10.1016/j.omtm.2021.04.007), 2021-04-16
Supplement: mmc1.pdf [file mmc1.pdf]

**OMTM, Volume 21**

**Supplemental information**

**The impact of lentiviral vector genome size  
and producer cell genomic to gag-pol mRNA  
ratios on packaging efficiency and titre**

**Nathan P. Sweeney and Conrad A. Vink**

## Supplemental Results

A

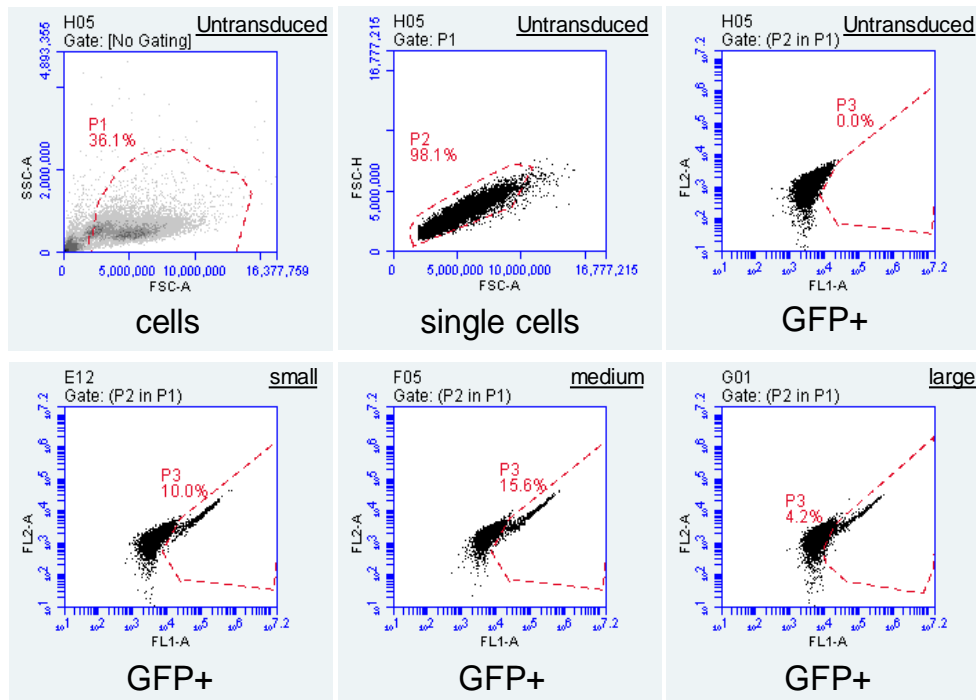

B

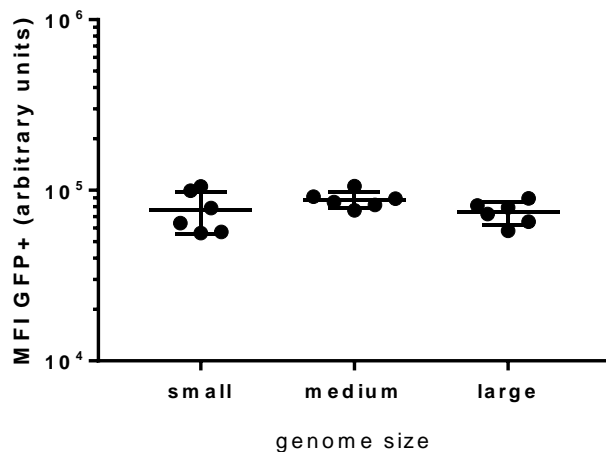

**Figure S1 – Flow cytometry analysis of GFP expression in HEK293T cells transduced by small, medium and large lentiviral vectors.** Representative flow cytometry plots (see Figure 2D) are shown in panel A. The gating strategy is to select cells from debris based on FSC-A and SSC-A followed by selecting single cells (FSC-H and FSC-A). The GFP expressing single cells are differentiated from strongly autofluorescent cells by plotting FL1-A (488 - 530/30) against FL2-A (488 - 585/40). The negative control (top right) was used to position the GFP+ gate 'P3'. A representative flow plot where between 3 and 30% GFP+ single cells were identified as GFP+ is shown for small, medium and large lentiviral vector transduced cells (bottom row). In panel B the median fluorescence intensity value from the cells within the GFP+ gate was plotted from 6 vector dilutions that gave between 3-30% GFP+ cells (for each size 3 data points are from vector produced using plasmids and 3 from nanoplastids). Each data point is shown; lines show the mean with error bars representing the standard deviation.
